# Supplementary material for: Assessing Future Precipitation Patterns, Extremes and Variability in Major Nile Basin Cities: An Ensemble Approach with CORDEX CORE Regional Climate Models
Source: MDPI journal article supplement (doi:10.3390/cli12010009), 2024-01-14
Supplement: s1 [file s1]

# **Assessing Future Precipitation Patterns, Extremes, and Variability in Major Nile Basin Cities: An Ensemble Approach with CORDEX CORE Regional Climate Models**

**Gamil Gamal<sup>1,\*</sup>, Pavol Nejedlik<sup>2</sup>, Ahmed M. El Kenawy<sup>3</sup>**

<sup>1</sup>Department of Natural Resources, Faculty of African Postgraduate Studies, Cairo University, Giza, Egypt

<sup>2</sup>Earth Science Institute v.v.i. of the Slovak Academy of Sciences, 840 05 Bratislava, Slovakia; geofpane@savba.sk

<sup>3</sup>Instituto Pirenaico de Ecologia, CSIC, Campus de Aula Dei, 1005. 50059, Zaragoza, Spain.

\*[gamil.gamal@cu.edu.eg](mailto:gamil.gamal@cu.edu.eg), ORCID <https://orcid.org/0000-0002-0923-7907>

Table S1. The location of each station and their attributes in the NRB

| Station     | Country     | Area (km <sup>2</sup> ) | Population (million) | Koppen Classification                      | Lat.   | Lon.   |
|-------------|-------------|-------------------------|----------------------|--------------------------------------------|--------|--------|
| Addis Ababa | Ethiopia    | 527                     | 5.5                  | Subtropical highland climate (Cwb)         | 8.98°  | 38.76° |
| Asmara      | Somalia     | 45                      | 1.1                  | Semi-arid cool climate (BSk)               | 15.32° | 38.93° |
| Cairo       | Egypt       | 3085                    | 22.2                 | Hot desert climate (BWh)                   | 30.04° | 31.24° |
| Dodoma      | Tanzania    | 418                     | 0.32                 | Subtropical steppe (BSh)                   | -6.16° | 35.75° |
| Gitega      | Burundi     | 22                      | 0.02                 | Temperate highland tropical climate (Cwb)  | -3.43° | 29.92° |
| Juba        | South Sudan | 52                      | 0.46                 | Tropical wet and dry/ savanna climate (Aw) | 4.86°  | 31.57° |
| Kampala     | Uganda      | 189                     | 3.8                  | Tropical rainforest (Af)                   | 0.35°  | 32.58° |
| Khartoum    | Sudan       | 22142                   | 6.3                  | Hot desert climate (BWh)                   | 15.5°  | 32.56° |
| Kigali      | Rwanda      | 730                     | 1.25                 | Tropical climate (Aw)                      | -1.94° | 30.06° |
| Kinshasa    | DR Congo    | 9965                    | 16.32                |                                            | -4.3°  | 15.31° |
| Nairobi     | Kenya       | 696.1                   | 4.4                  | Subtropical highland (Cfb)                 | -1.29° | 36.82° |

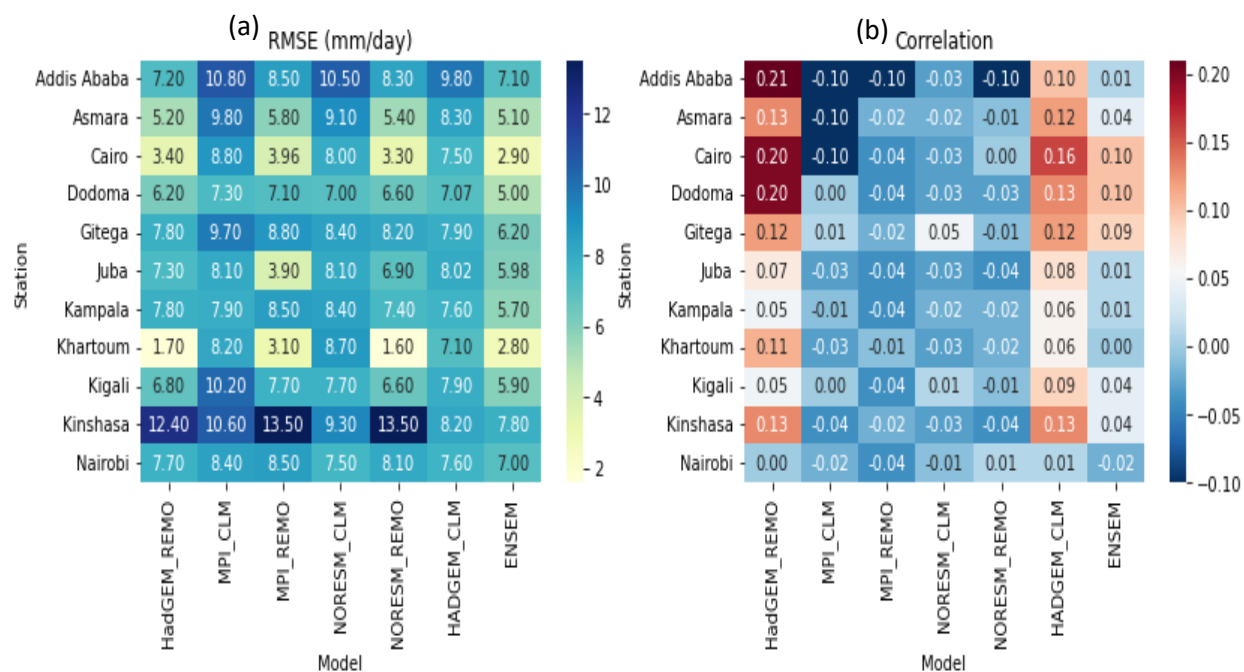

Figure S1. (a) The Root mean square error (RMSE), and (b) The correlation coefficient for the six models and ENSEM before bias correction

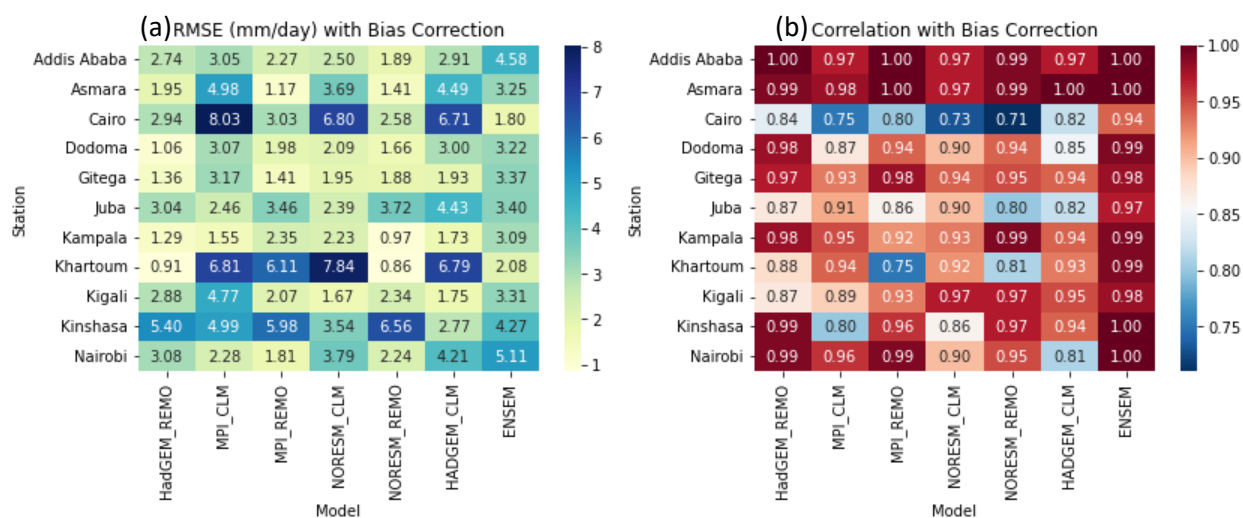

Figure S2. (a) The Root mean square error (RMSE), and (b) The correlation coefficient for the six models and ENSEM after bias correction

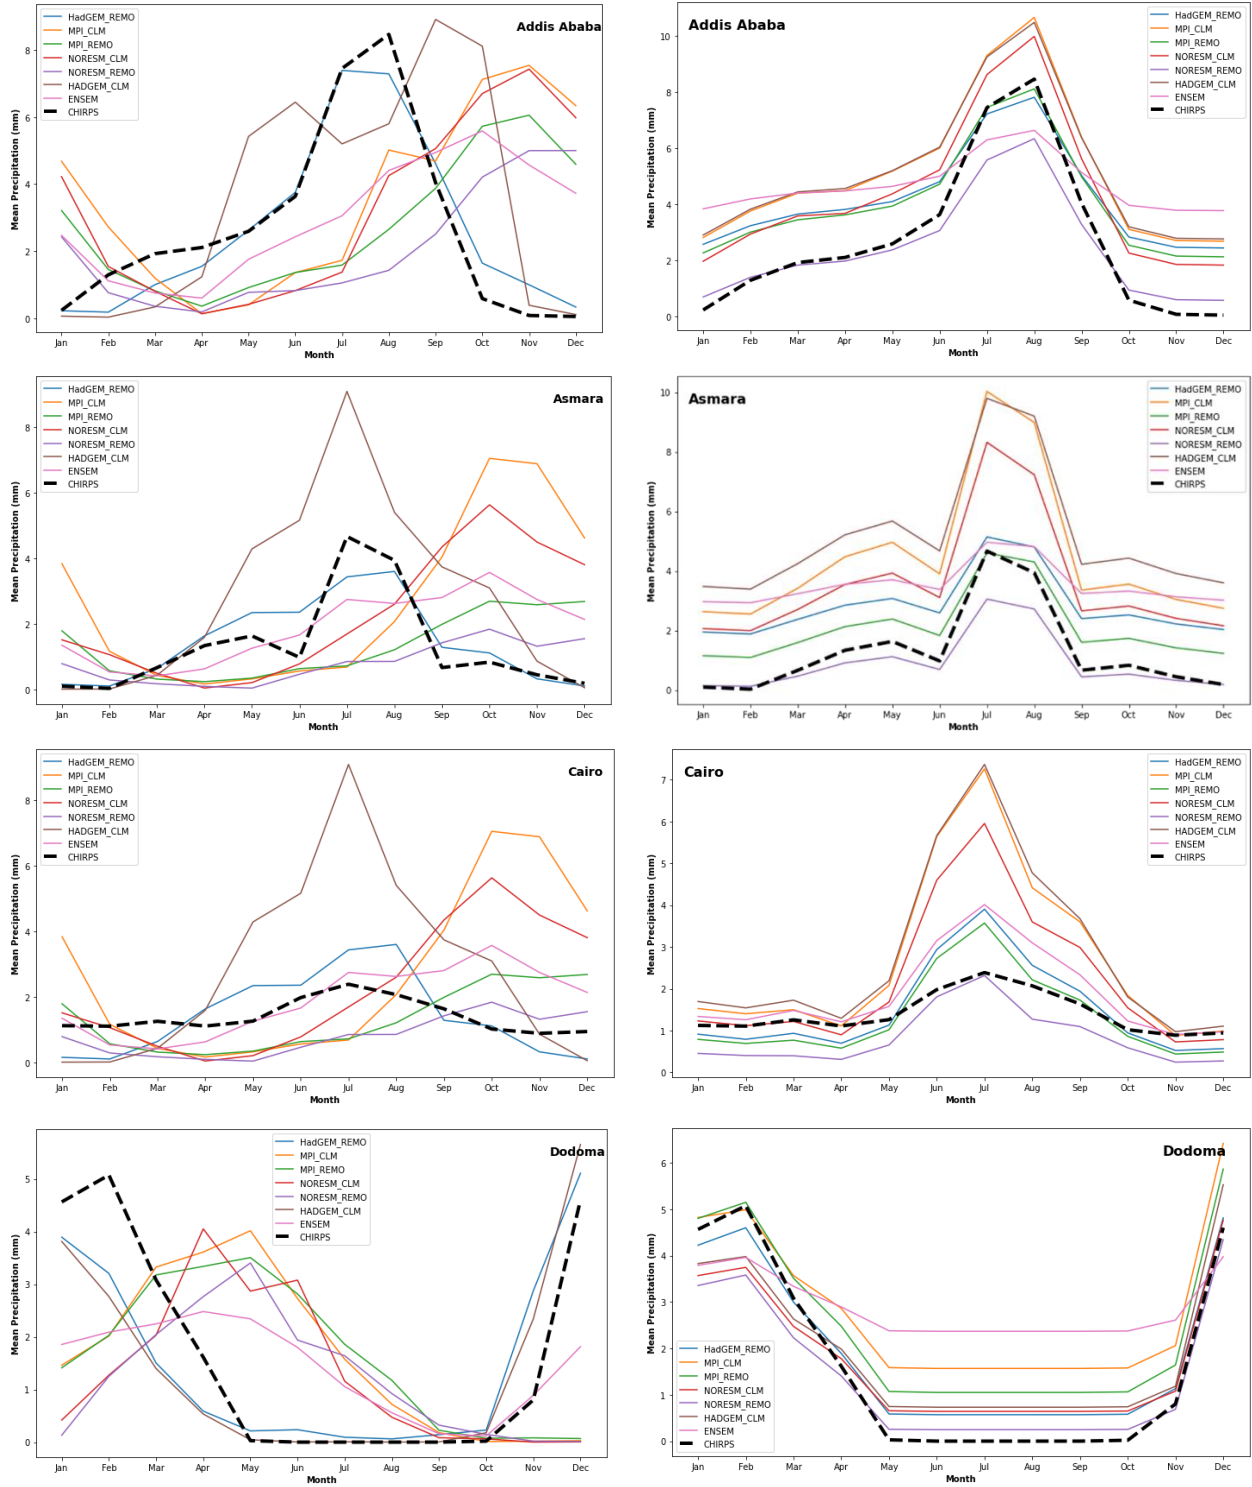

Figure S3. The seasonal variation of precipitation for stations (Addis Ababa, Asmara, Cairo, and Dodoma), before BC (left) and after BC (right).

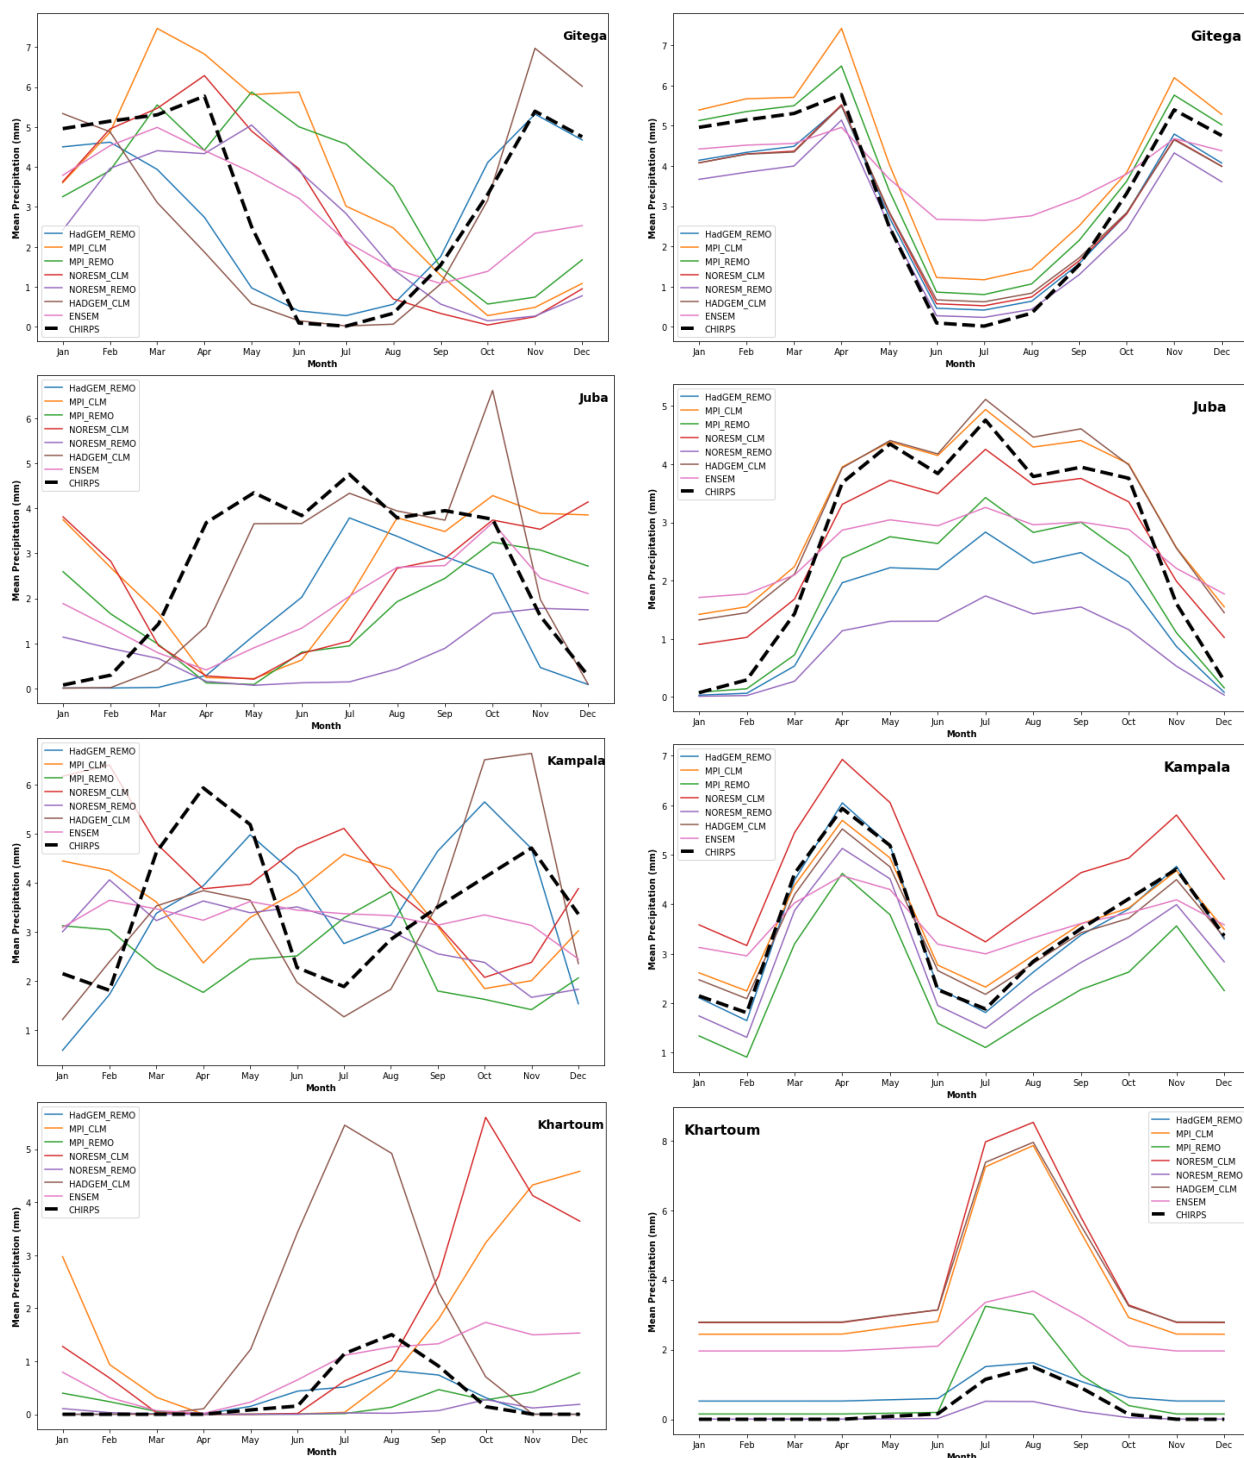

Figure S4. as S3 but for stations (Gitega, Juba, Kampala, and Khartoum), before BC (left) and after BC (right).

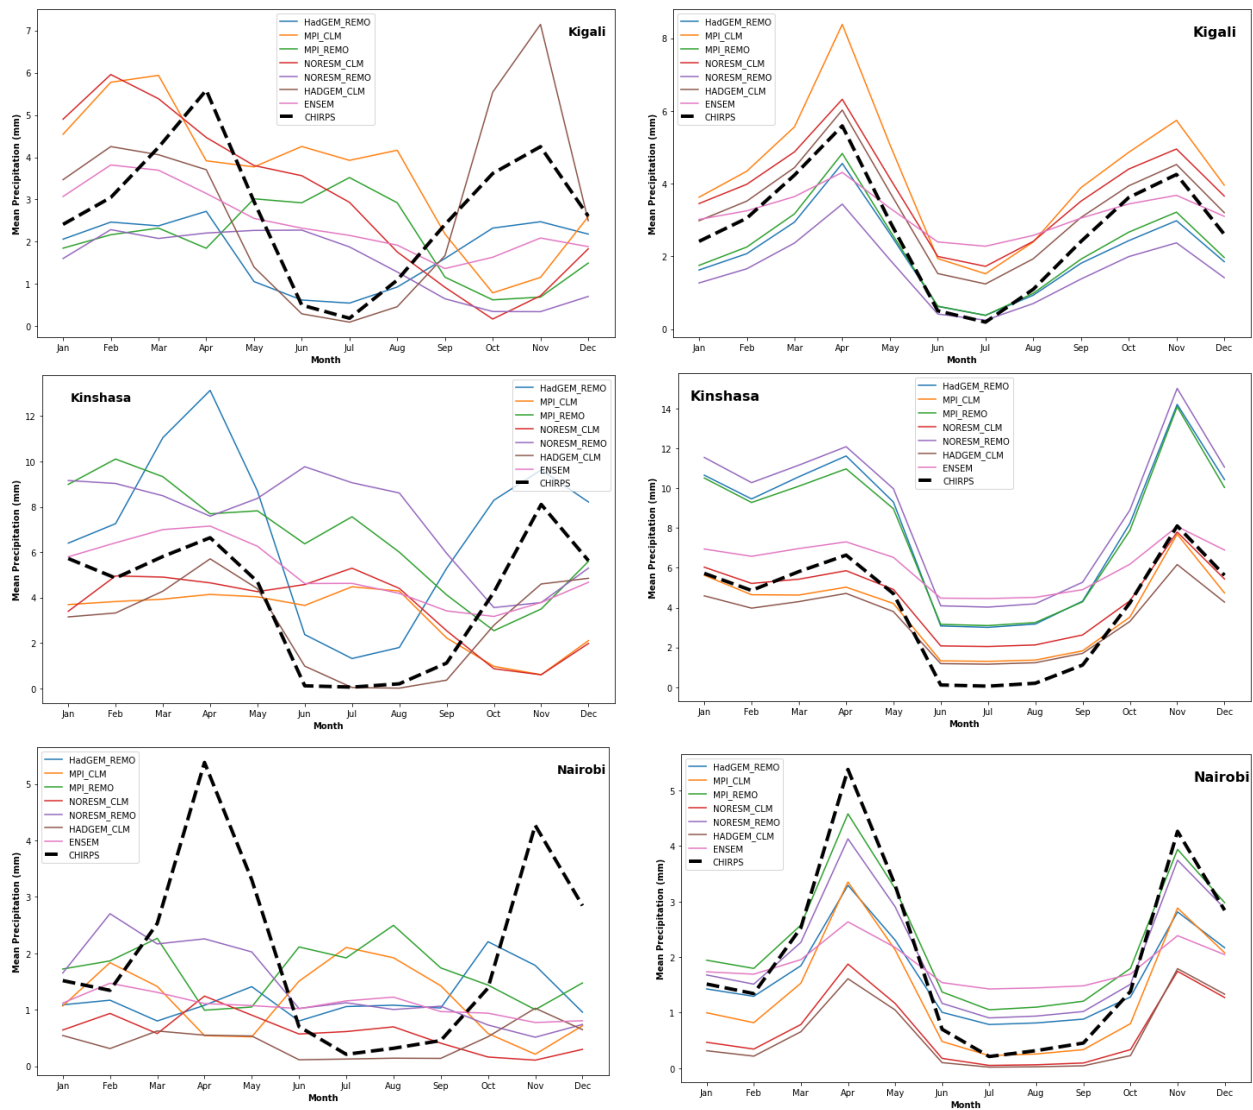

Figure S5. as S3 but for stations (Kigali, Kinshasa, and Nairobi), before BC (left) and after BC (right).

Table S2. The relative change in precipitation for the first period (2041-2060) and the second period (2081-2100) under RCP2.6 and RCP8.5 scenarios

| Station     | 2041-2060 |         | 2081-2100 |         |
|-------------|-----------|---------|-----------|---------|
|             | RCP2.6    | RCP8.5  | RCP2.6    | RCP8.5  |
| Addis Ababa | 8.36*     | 9.97*   | 8.26*     | 15.23*  |
| Asmara      | 14.53*    | 11.48*  | 4.68      | 3.21    |
| Cairo       | -92.12*   | -91.85* | -91.63*   | -93.11* |
| Dodoma      | -6.88*    | 0.57    | 3.99      | 14.68*  |
| Gitega      | 1.25      | 1.32    | 4.98*     | 9.01*   |
| Juba        | 0.29      | 4.81*   | 6.64*     | 2.42    |
| Kampala     | 0.39      | 1.17    | 7.93*     | 2.36    |
| Khartoum    | 26.35*    | 49.08*  | 17.09*    | -6.70   |
| Kigali      | 13.59*    | 13.66*  | 15.06*    | 27.93*  |
| Kinshasa    | -11.17*   | -16.36* | -13.30*   | -38.93* |
| Nairobi     | 4.39*     | 8.14*   | 11.31*    | 79.80   |



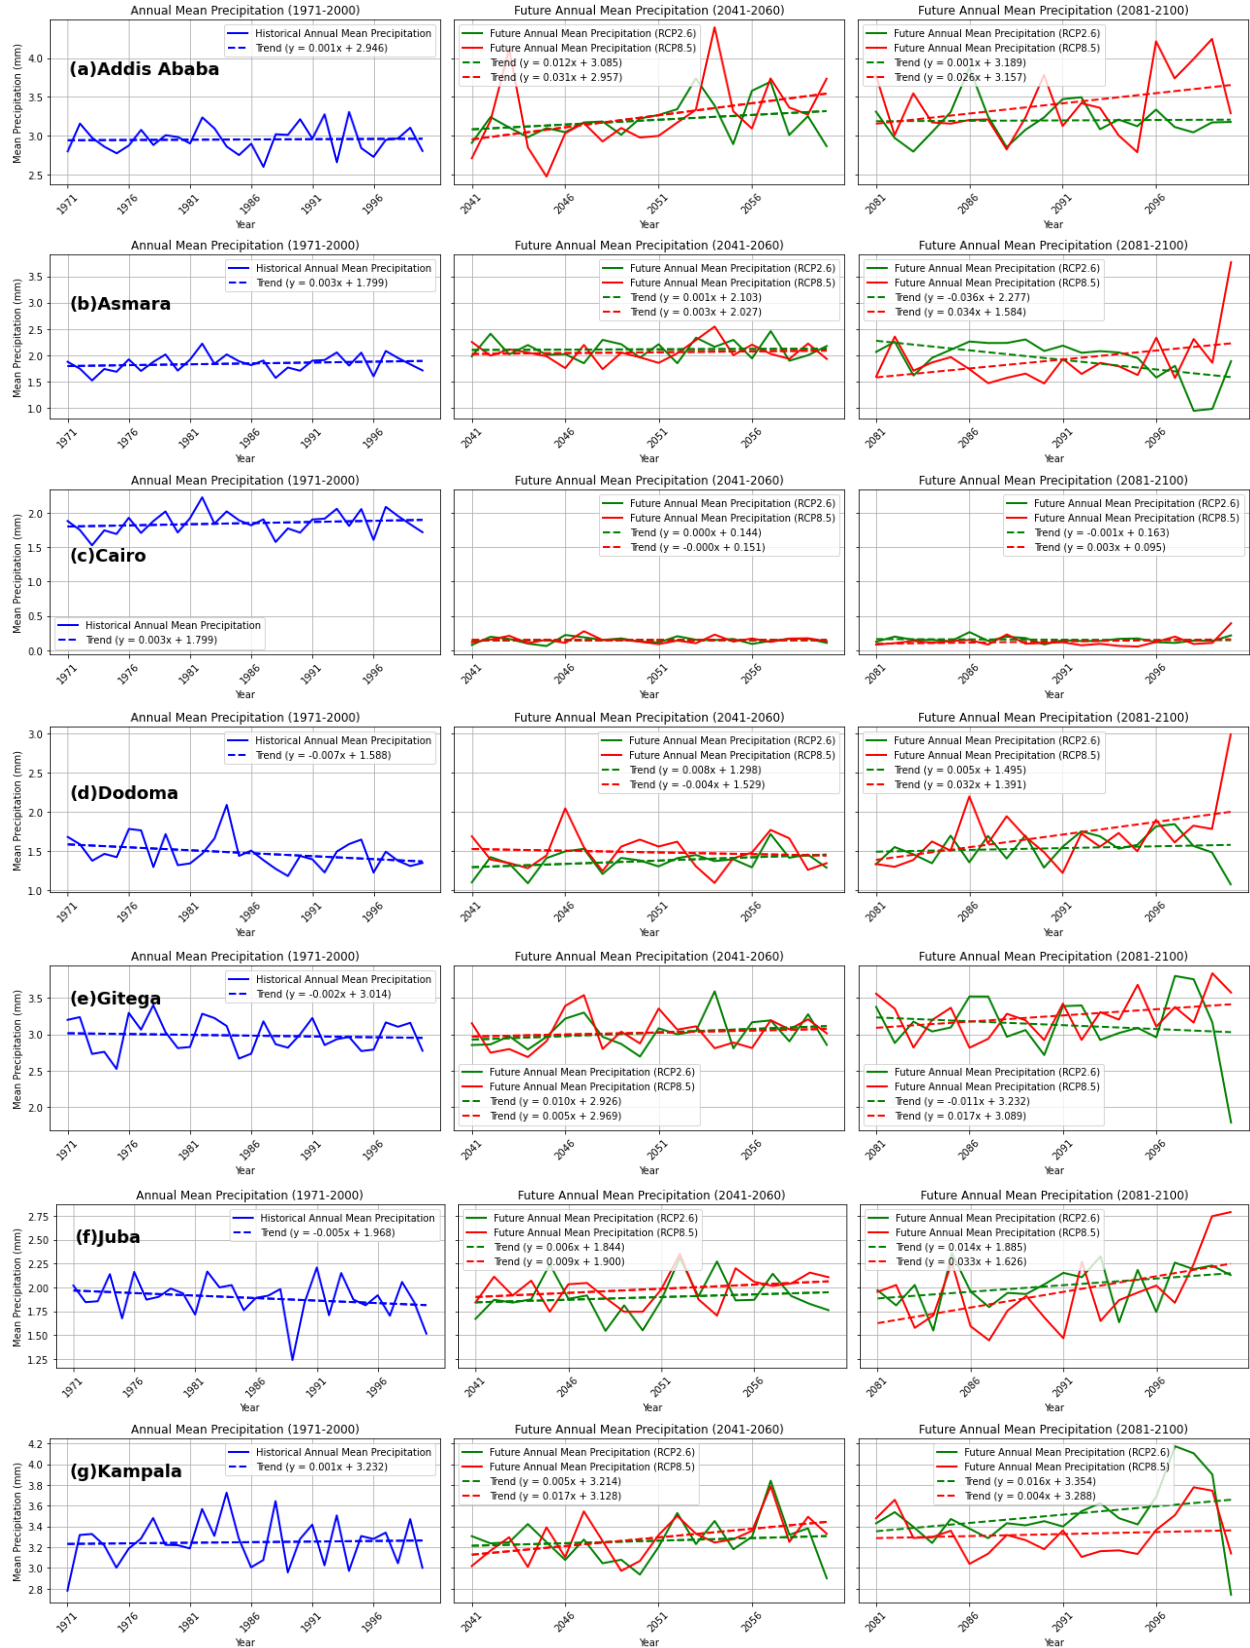

Figure S6, Time-series plot of precipitation for (a) Addis Ababa, (b) Asmara, (c) Cairo, (d) Dodoma, (e) Gitega, (f) Juba, and (g) Kampala

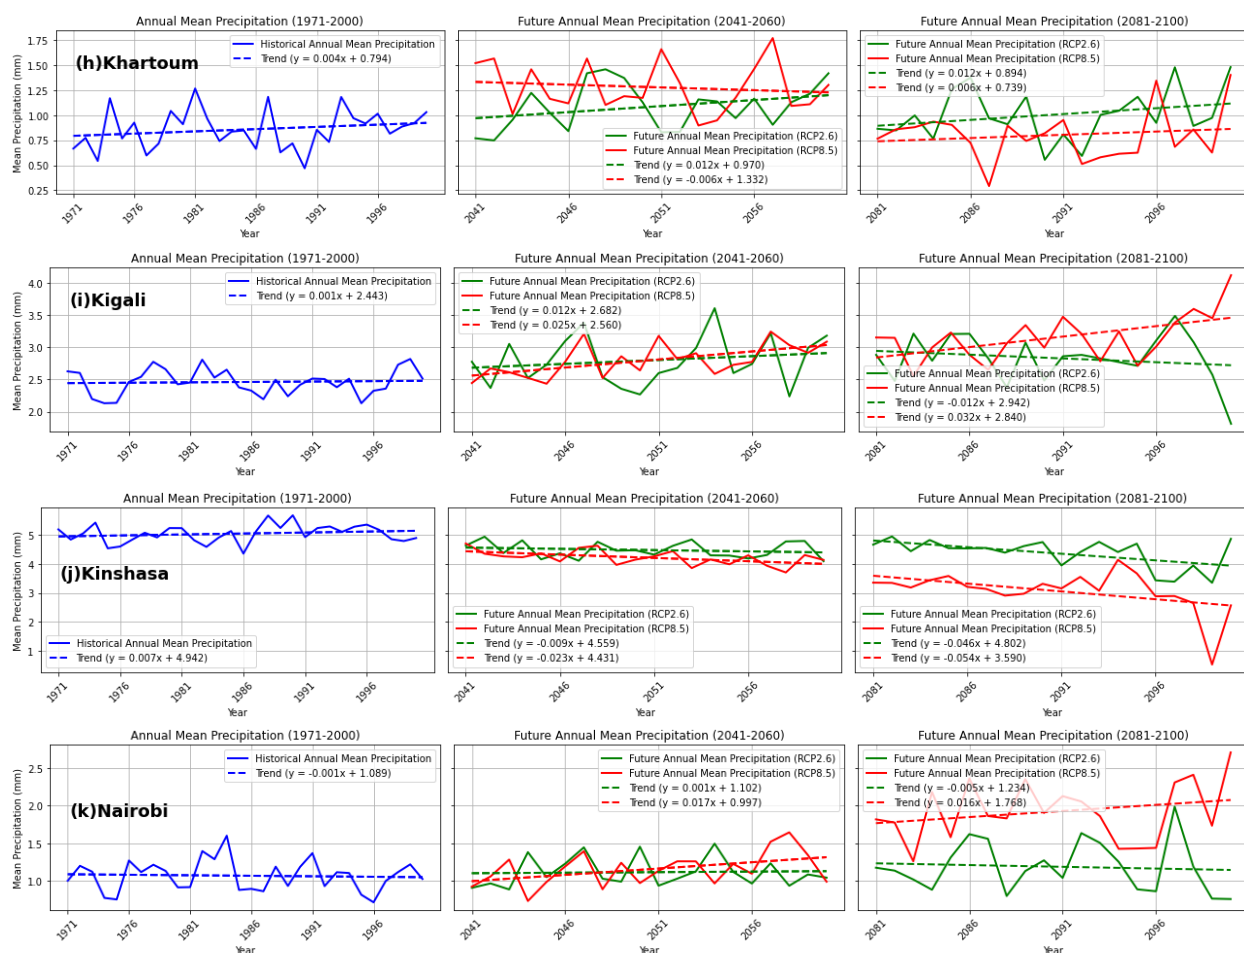

Figure S7, Time-series plot of precipitation for (h) Khartoum, (i) Kigali, (j) Kinshasa, and (k) Nairobi

Table S3. The relative change in RX1Day and RX5Day for each station under RCP2.6 and RCP8.5 scenarios for mid-future (2041-2060) and far-future (2081-2100)

| Station            | RX1Day    |         |           |         | RX5Day    |         |           |         |
|--------------------|-----------|---------|-----------|---------|-----------|---------|-----------|---------|
|                    | 2041-2060 |         | 2081-2100 |         | 2041-2060 |         | 2081-2100 |         |
|                    | RCP2.6    | RCP8.5  | RCP2.6    | RCP8.5  | RCP2.6    | RCP8.5  | RCP2.6    | RCP8.5  |
| <b>Addis Ababa</b> | 1.15*     | 19.52*  | 66.15*    | 98.06*  | 8.18*     | 9.87*   | 45.93*    | 67.46*  |
| <b>Asmara</b>      | 27.02*    | 65.76*  | 24.88     | 108.65  | 8.21*     | 35.45*  | 47.52     | 123.54  |
| <b>Cairo</b>       | -15.10*   | -13.63* | -42.74*   | 24.84*  | -48.65*   | -14.11* | -70.22*   | -35.97* |
| <b>Dodoma</b>      | -12.19    | 46.38   | 17.13     | 268.05* | -9.29     | 1.76    | 34.22     | 221.17* |
| <b>Gitega</b>      | -8.33     | 0.27    | 57.53*    | 125.82* | 28.97     | 13.26   | 38.95*    | 80.42*  |
| <b>Juba</b>        | 61.65     | 43.01*  | 80.54*    | 167.66  | 7.95      | 2.43*   | 29.72*    | 131.75  |
| <b>Kampala</b>     | 33.23     | 33.87   | 71.39*    | 206.21  | -1.26     | 17.22   | 11.62*    | 84.79   |
| <b>Khartoum</b>    | 94.05*    | 77.02*  | 55.75*    | 40.34   | 44.30*    | 19.20*  | 70.05*    | 84.02   |
| <b>Kigali</b>      | 56.21*    | 0.11*   | 21.59*    | 90.46*  | 56.12*    | 26.86*  | 33.30*    | 69.87*  |
| <b>Kinshasa</b>    | 46.59*    | 38.98*  | 59.64*    | 61.60*  | -8.19*    | -21.85* | 57.81*    | 19.45*  |
| <b>Nairobi</b>     | -4.8      | 9.98    | 27.75*    | 87.53*  | -7.52     | -17.60  | 18.51*    | 53.33*  |

Note: Positive values indicate an increase in extreme precipitation events, while negative values indicate a decrease. The asterisk (\*) indicates that the change is statistically significant (P-value < 0.05).

Table S4. The relative change in CWD and CDD for each station under RCP2.6 and RCP8.5 scenarios for mid-future (2041-2060) and far-future (2081-2100)

| Station            | CWD       |         |           |         | CDD       |         |           |         |
|--------------------|-----------|---------|-----------|---------|-----------|---------|-----------|---------|
|                    | 2041-2060 |         | 2081-2100 |         | 2041-2060 |         | 2081-2100 |         |
|                    | RCP2.6    | RCP8.5  | RCP2.6    | RCP8.5  | RCP2.6    | RCP8.5  | RCP2.6    | RCP8.5  |
| <b>Addis Ababa</b> | -41.5*    | -41.5*  | 6.12*     | -12.24* | -55.75*   | -70.8*  | -12.39*   | -15.04* |
| <b>Asmara</b>      | -30*      | -44*    | -8        | -38     | -38.39*   | -41.96* | 39.29     | 26.79   |
| <b>Cairo</b>       | -92*      | 90*     | -90*      | -94*    | 65.18*    | 139.29* | 51.79*    | 143.75* |
| <b>Dodoma</b>      | -22.73    | -31.82  | 0.0       | -27.27* | -35.26    | -23.72  | 14.10     | 9.62*   |
| <b>Gitega</b>      | -37.06    | -50     | -25.29*   | -35.88* | -64.10    | -73.08  | 61.54*    | 51.28*  |
| <b>Juba</b>        | -27.42    | -12.9*  | 78.10*    | -20.97  | -64.57    | -75.59* | 0.0*      | -23.62  |
| <b>Kampala</b>     | 0.0       | -12.3   | 4.92*     | 9.02    | 0.0       | 0.0     | -7.69*    | 100     |
| <b>Khartoum</b>    | 27.27*    | 22.73*  | 104.55*   | -4.55   | -31.67*   | -44.8*  | 1.81*     | -4.52   |
| <b>Kigali</b>      | 10.98*    | -14.63* | 21.95*    | 17.07*  | -46.34*   | -36.59* | 95.12*    | 78.05*  |
| <b>Kinshasa</b>    | -28.28*   | -52.05* | -11.07*   | -68.03* | -81.25*   | -71.88* | 28.12*    | 603.12* |
| <b>Nairobi</b>     | -55.81    | -55.81  | -34.88*   | 32.56*  | 70.21     | 51.06   | 140.43*   | 129.79* |

The asterisk (\*) indicates that the change is statistically significant (P-value < 0.05).
